# Supplementary material
Source: PubMed Central journal article supplement (PMC1785405)
Supplement: plntcell_tpc.106.042028_2.pdf [file plntcell_tpc.106.042028_2.pdf]

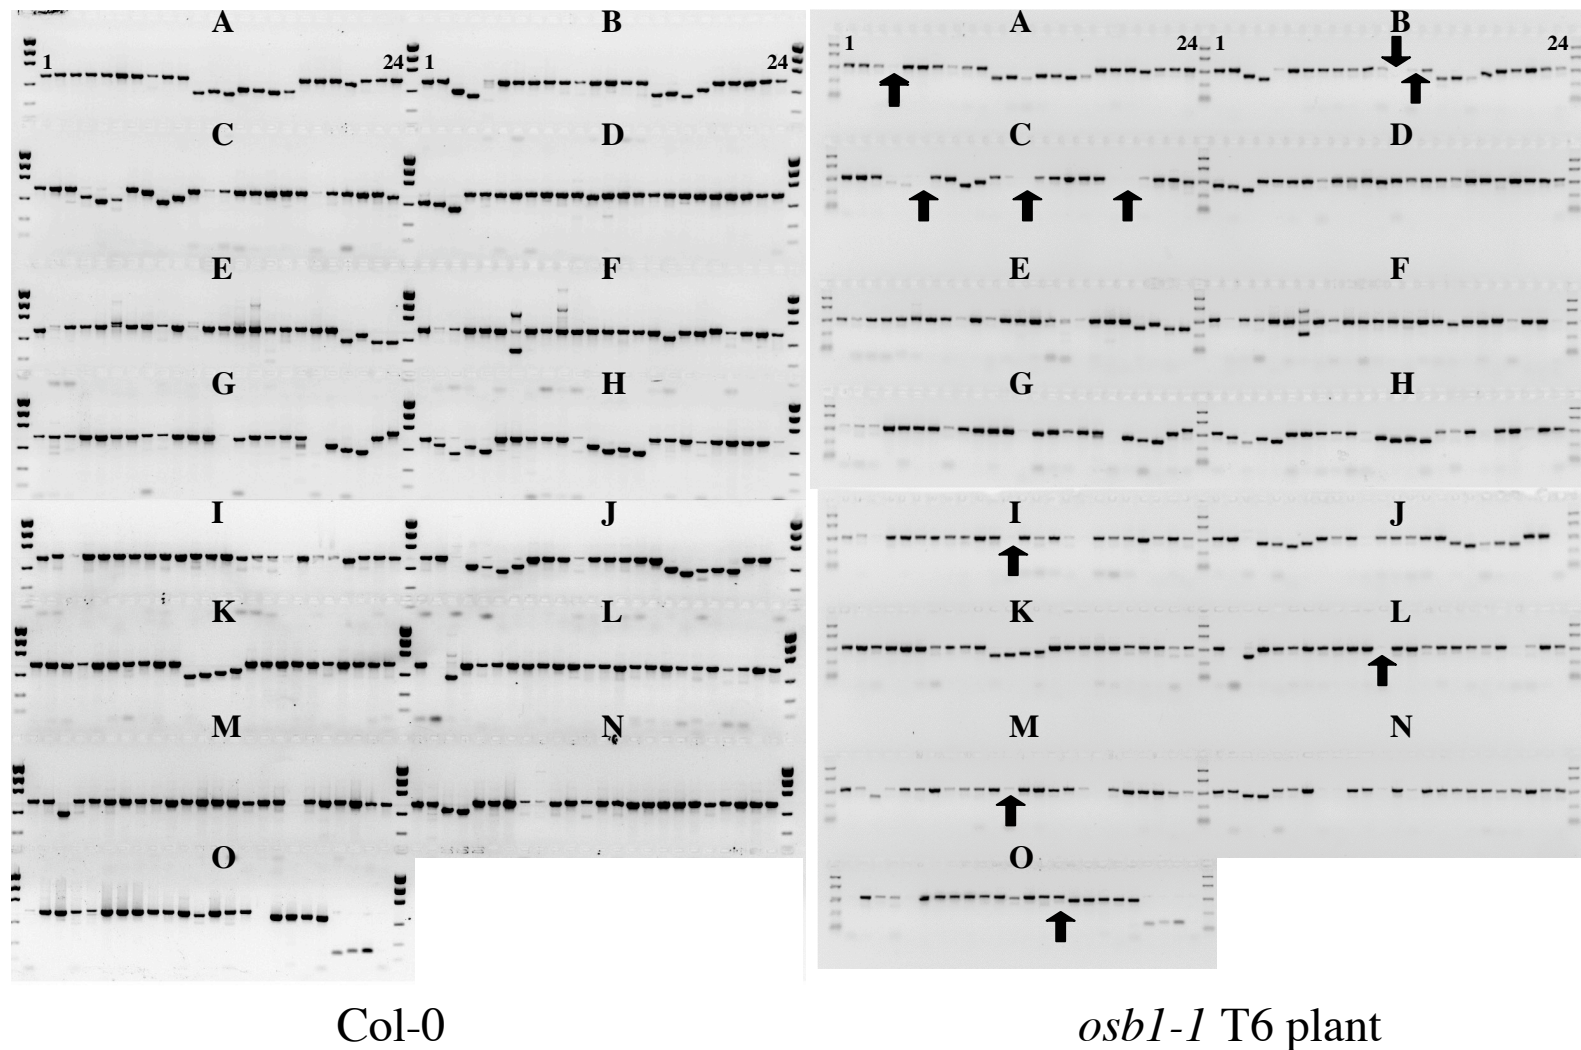

**Supplemental Figure 2.** PCR analysis of Col-0 and *osb1* mutant mtDNA. Each PCR amplification was performed with specific primers. Supplemental Table 1 gives the genomic coordinates on the C24 mtDNA genome of the forward primer, as well as the size of each amplification product. The locations of mt genes are indicated in the Table. The products of the amplification experiments were analyzed by agarose gel electrophoresis. The amplifications are presented as 15 groups (A to O) of 24 experiments. Five different *osb1* plants (four *osb1-1*, one *osb1-2*) with clear morphological phenotypes of variegation and distortion were analyzed and the PCR profiles compared to the one of wild type Col-0. Differences found for one *osb1-1* plant, taken as example, are shown by arrows in the Figure and in grey background in Supplemental Table 1.
